# Supplementary material
Source: PubMed Central journal article supplement (PMC3389974)
Supplement: supp_112.138685_FigureS1.pdf [file supp_112.138685_FigureS1.pdf]

```
>Hnf4a
  A   C   G   T
1: -0.46 0.59 -0.78 0.66
2: -0.88 1.62 -1.57 0.82
3: -0.32 4.21 -3.19 -0.71
4:  0.42 4.90 -2.01 -3.31
5:  0.43 -1.17 0.89 -0.15
6: -0.56 -0.85 0.23 1.19
7: -0.84 0.51 -0.04 0.36
8: -0.21 -0.02 0.23 -0.01
```

**Figure S1** Energy PWM for Hnf4a from BEEML-PBM analysis
