# Supplementary material
Source: PubMed Central journal article supplement (PMC3389974)
Supplement: supp_112.138685_FigureS2.pdf [file supp_112.138685_FigureS2.pdf]

```
>Hnf4a-di4.5
1: -0.30  0.37 -0.55  0.48
2: -0.94  1.19 -1.23  0.98
3:  0.73  2.37 -2.72 -0.39
4:  0.59  2.08 -1.15 -1.53
5: -0.03  0.27  0.33 -0.58
6:  0.47 -1.64  0.84  0.33
7: -1.57  1.33 -0.64  0.87
8: -0.29 -0.02  0.25  0.06
4,5: -0.14  0.30  0.35 -0.51 -0.91  0.34 -0.40  0.97  0.84  0.66 -0.68 -0.81
0.21 -1.29  0.72  0.36
```

**Figure S2** Energy model for Hnf4a including di-nucleotide interactions between positions 4 and 5.
