# Supplementary material
Source: PubMed Central journal article supplement (PMC3389974)
Supplement: supp_112.138685_FigureS3.pdf [file supp_112.138685_FigureS3.pdf]

```

>Hnf4a-primary   Seed k-mer: GGGGTCAA   Enrichment Score: 0.494711
1:   -0.71    0.88   -2.53    2.36
2:   -1.66    2.44   -3.46    2.68
3:    1.25    2.78   -4.40    0.37
4:    1.67    3.52   -3.64   -1.55
5:    1.54    2.41    0.06   -4.01
6:    2.25   -3.94    1.62    0.07
7:   -2.89   -0.61    0.63    2.87
8:   -1.60    0.33    0.58    0.68

>Hnf4a-secondary Seed k-mer: AAAGTCCA   Enrichment Score: 0.496885
1:   -2.55    1.67    0.59    0.29
2:   -2.12    1.62   -0.61    1.11
3:   -3.57    2.32   -0.44    1.69
4:    1.27    1.86   -4.60    0.93
5:    1.41    2.16    0.42   -3.98
6:    0.51   -3.55    1.97    1.06
7:    2.01   -3.98    1.35    0.62
8:   -3.15    2.49   -0.93    1.59

```

**Figure S3** Primary and secondary PWMs from UniProbe database.
